# Supplementary material for: Colloid-catalysed arene hydrogenation in aqueous/supercritical fluid biphasic media
Source: Royal Society of Chemistry journal article supplement (doi:10.1039/a907193h), 2000-01-01
Supplement: a907193h.doc [file a907193h.doc]

# Supplementary Material: Colloid-catalysed arene hydrogenation in aqueous/supercritical fluid biphasic media

# R. Jason Bonilla, Brian R. James, and Philip G. Jessop*

**Experimental Details**

[RhCl(COD)]2 dimer (Pressure Chemical), ethane (Nellcor, 99.995% purity), CO2 (Air Products, SFC grade without He head gas, 99.9999%), and H2 (Praxair, 99.99%) were used without purification. 2-Methoxy-4-propylphenolS1 and [bmim]BF4S2 were prepared as described in the literature, while the other arenes were commercially available. All liquids were degassed before use.

Under an inert atmosphere, 2-methoxy-4-propylphenol (170 mg), [RhCl(COD)]2 (5 mg), THS (22 mg), aqueous buffer (pH 7.5, 1.5 mL) and magnetic stir bar were put inside a glass liner within a 31 mL vessel. The vessel was then sealed and placed in a water bath at 36C. Immediately after H2 (ca. 10 bar) was added, ethane was pumped into the vessel (240 bar total pressure) via a Jasco PU-980 pump. After 72 h, the vessel was placed in a dry ice/acetone bath to cool, and then vented and thawed slowly. A CDCl3 solution of the organic products was filtered through diatomaceous earth and analysed by 1H NMR spectroscopy. The spectral data have been published previously.S1 Experiments with liquid ethane, liquid CO2 and scCO2 were performed similarly.

The aqueous phase was a phosphate/boric acid/citric acid buffer with an initial pH of 7.5 (0.1 M Na3PO4), although under CO2 pressure the pH drops significantly (line “c” in Figure 1). This pH drop could be ameliorated slightly by changing the buffer to a more concentrated phosphate buffer (line “a”) or to a 1 M MOPS buffer (3-[N-morpholino]propanesulfonic acid hemisodium salt, line "b") but there still was no significant catalytic activity.

####
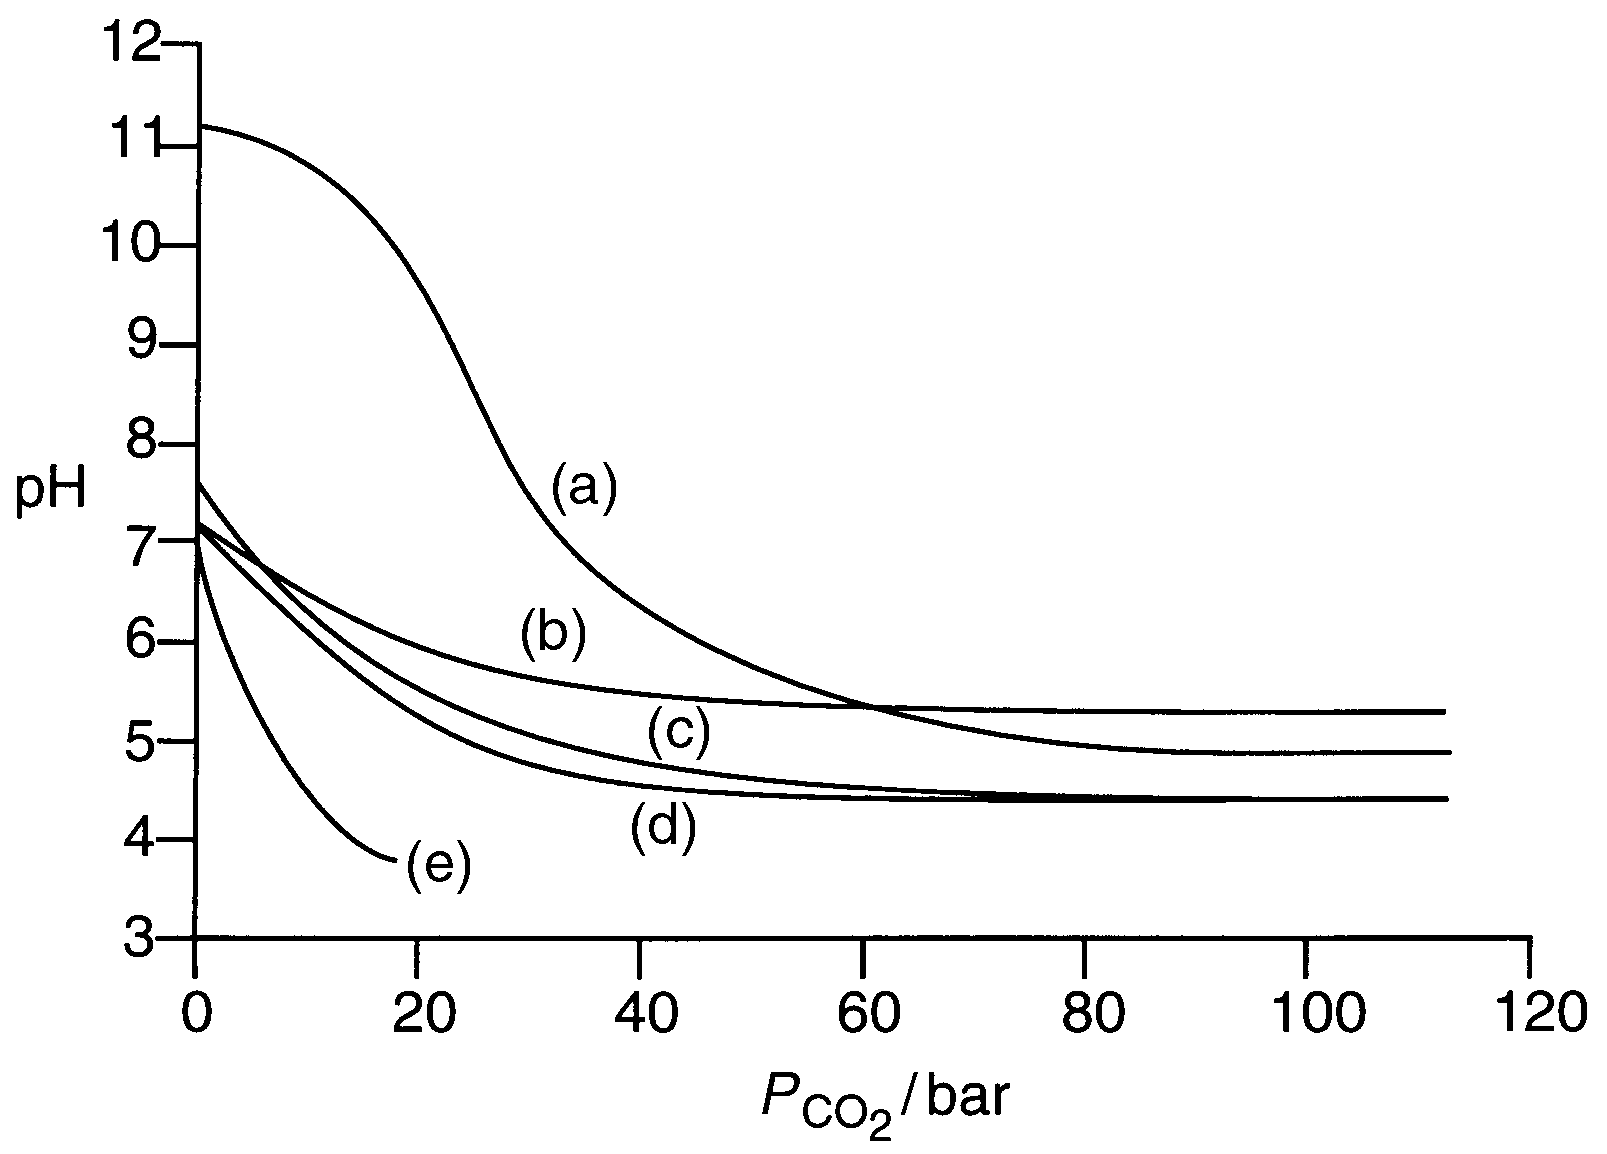


#### Fig. 1 Dependence of the pH of aqueous buffer solutions on the pressure of CO2 at 36˚C in the presence of 9 bar H2. The five buffer solutions are a) 11.2 buffer (0.5 M Na3PO4, 0.05 M citric acid, 0.2 M boric acid), b) concentrated MOPS buffer (1.0 M), c) 7.5 buffer (0.1 M Na3PO4, 0.05 M citric acid, 0.2 M boric acid), d) dilute MOPS buffer (0.1 M), and e) unbuffered water. The pH values, which are only approximate (estimated error ±0.3), were determined by visual observations of the buffer solutions, doped with various indicators, in a vessel with sapphire windows. The pH of unbuffered water at elevated pressures of CO2 is 2.80-2.95.S3

S1 T. Q. Hu, B. R. James, S. J. Rettig, and C.-L. Lee, *Can. J. Chem.*, 1997, **75**, 1234-1239.

S2 J. G. Huddleston, H. D. Willauer, R. P. Swatloski, A. E. Visser, and R. D. Rogers, *Chem. Commun.*, 1998, 1765-1766.

S3 K. L. Toews, R. M. Shroll, C. M. Wai, and N. G. Smart, *Anal. Chem.*, 1995, **67**, 4040-4043.
